# Supplementary material for: I Want to Participate—Communities of Practice in Foraging and Gardening Projects as a Contribution to Social and Cultural Sustainability in Early Childhood Education
Source: MDPI journal article supplement (doi:10.3390/su13084368), 2021-04-14
Supplement: s1 [file s1]

## **Focus group interview guide - Foraging in Kindergarten**

(Short questions and keywords for semi structural interview)

### **Staff competence**

Can you describe how it has been for the staff group to work with this project for 3 years.

- What is required to plan and carry out such a project?
- Practical implementation, responsibility, shared work and implementation
- Competence - what competence is needed and what competence has the project provided?
- Positive and negative experiences?

How did you come up with the various activities in the project?

- Competence, experiences, tradition, culture

### **Food from nature and formative development/bildung**

According to the framework plan, the kindergarten shall promote education as a basis for formative development/ bildung. What thoughts do you have about this project's contribution to promote this?

- Feel free to link this to specific events

Are there any of the activities within the project (catching, fishing, harvesting, processing, cooking and tasting) that you think have engaged the children more than others?

- Why? Are the activities carried out differently?
- Success criteria?

### **Children understanding nature**

In the subject area "nature, environment and technology", it is stated that children should gain knowledge about animals and plants and wonder about the diversity of nature. Can you tell if the children through words or actions have expressed knowledge, understanding or curiosity about nature that can be linked to the activities in the project?

- Along the way
- Afterwards
- In Everyday life
- How?

## **Focus group interview guide - Gardening in Kindergarten**

(Short questions and keywords for semi structural interview)

### **Staff motivation**

- What has motivated you to work with this gardening project in kindergarten?
- Do you have experience from gardening or foraging from your own childhood?
- Do you grow or harvest food at home?

### **Staff competence**

Can you describe how it has been for the staff group to work with this project for 1 year.

- What is required to plan and carry out such a project?
- Practical implementation, responsibility, shared work and implementation
- Competence - what competence is needed and what competence has the project provided?
- Positive and negative experiences?

How did you come up with the various activities in the project?

- Competence, experiences, tradition, culture

### **Food from nature and formative development/bildung**

According to the framework plan, the kindergarten shall promote education as a basis for formative development/ bildung. What thoughts do you have about this project's contribution to promote this?

- Feel free to link this to specific events

Are there any of the activities within the project (catching, fishing, harvesting, processing, cooking and tasting) that you think have engaged the children more than others?

- Why? Are the activities carried out differently?
- Success criteria?

### **Children understanding nature**

In the subject area "nature, environment and technology", it is stated that children should gain knowledge about animals and plants and wonder about the diversity of nature. Can you tell if the children through words or actions have expressed knowledge, understanding or curiosity about nature that can be linked to the activities in the project?

- Along the way
- Afterwards
- In Everyday life
- How?
